# Supplementary material
Source: Springer Nature journal article supplement (https://www.springerprofessional.de/resource/supplementary/13638_2014_999_MOESM2_ESM.pdf/11898978)

# Butler Beams and Omni Antenna Patterns

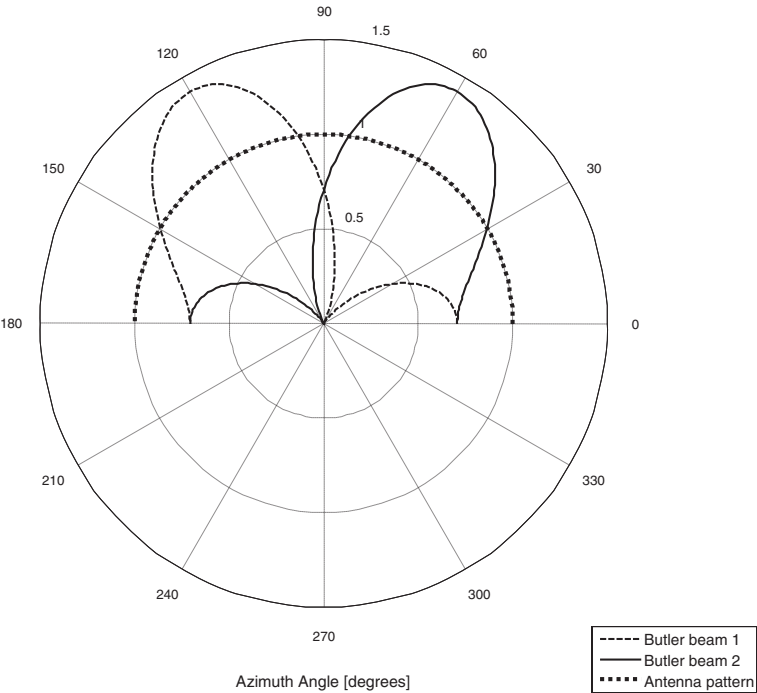

Supplement: MOESM2 [file 11898978]
